# Supplementary material for: Diverse cell-specific patterns of alternative polyadenylation in Drosophila
Source: PubMed Central journal article supplement (PMC9470587; doi:10.1038/s41467-022-32305-0), 2022-09-13
Supplement: 41467_2022_32305_MOESM2_ESM.pdf [file 41467_2022_32305_MOESM2_ESM.pdf]

1  
2  
3  
4  
5  
6  
7  
8  
9  
10  
11  
12  
13  
14  
15  
16  
17  
18  
19  
20  
21  
22  
23  
24  
25  
26  
27  
28  
29  
30  
31  
32  
33  
34  
35  
36

**Description of Additional Supplementary Files**

- File Name: Supplementary Data 1
- Description: Complete analysis relative 3' isoform usage of signature APA genes across all cell types in the Fly Cell Atlas.
- File Name: Supplementary Data 2
- Description: Numbers of cells used for each of the Fly Cell Atlas cell type assignments.
- File Name: Supplementary Data 3
- Description: Genes expressing distinctive TUTR-APA or ALE-APA isoforms in neurons.
- File Name: Supplementary Data 4
- Description: Genes undergoing TUTR-APA or ALE-APA shifts in the male germline lineage.
- File Name: Supplementary Data 5
- Description: Genes undergoing TUTR-APA or ALE-APA shifts in the intestinal stem cell lineage.
- File Name: Supplementary Data 6
- Description: List of RNA binding proteins (RBPs) assessed in this study.
- File Name: Supplementary Data 7
- Description: RBPs with differential cell-specific expression within cell types of the FCA body, gut and testis datasets.
- File Name: Supplementary Data 8
- Description: RBPs with differential cell-specific expression between male germline stem cells and spermatocytes.
- File Name: Supplementary Data 9
- Description: Relative numbers of miRNA binding sites discovered from 3' UTRs of spermatogenesis shortening genes.
- File Name: Supplementary Data 10
- Description: Relative numbers of RBP binding sites discovered from 3' UTRs of spermatogenesis shortening genes.
